# Supplementary material
Source: PubMed Central journal article supplement (PMC2734135)
Supplement: msp024_2.pdf [file msp024_2.pdf]

Figure S1. Flow chart describing the genotyping, data cleaning, and phasing of the two sample sets in this study.

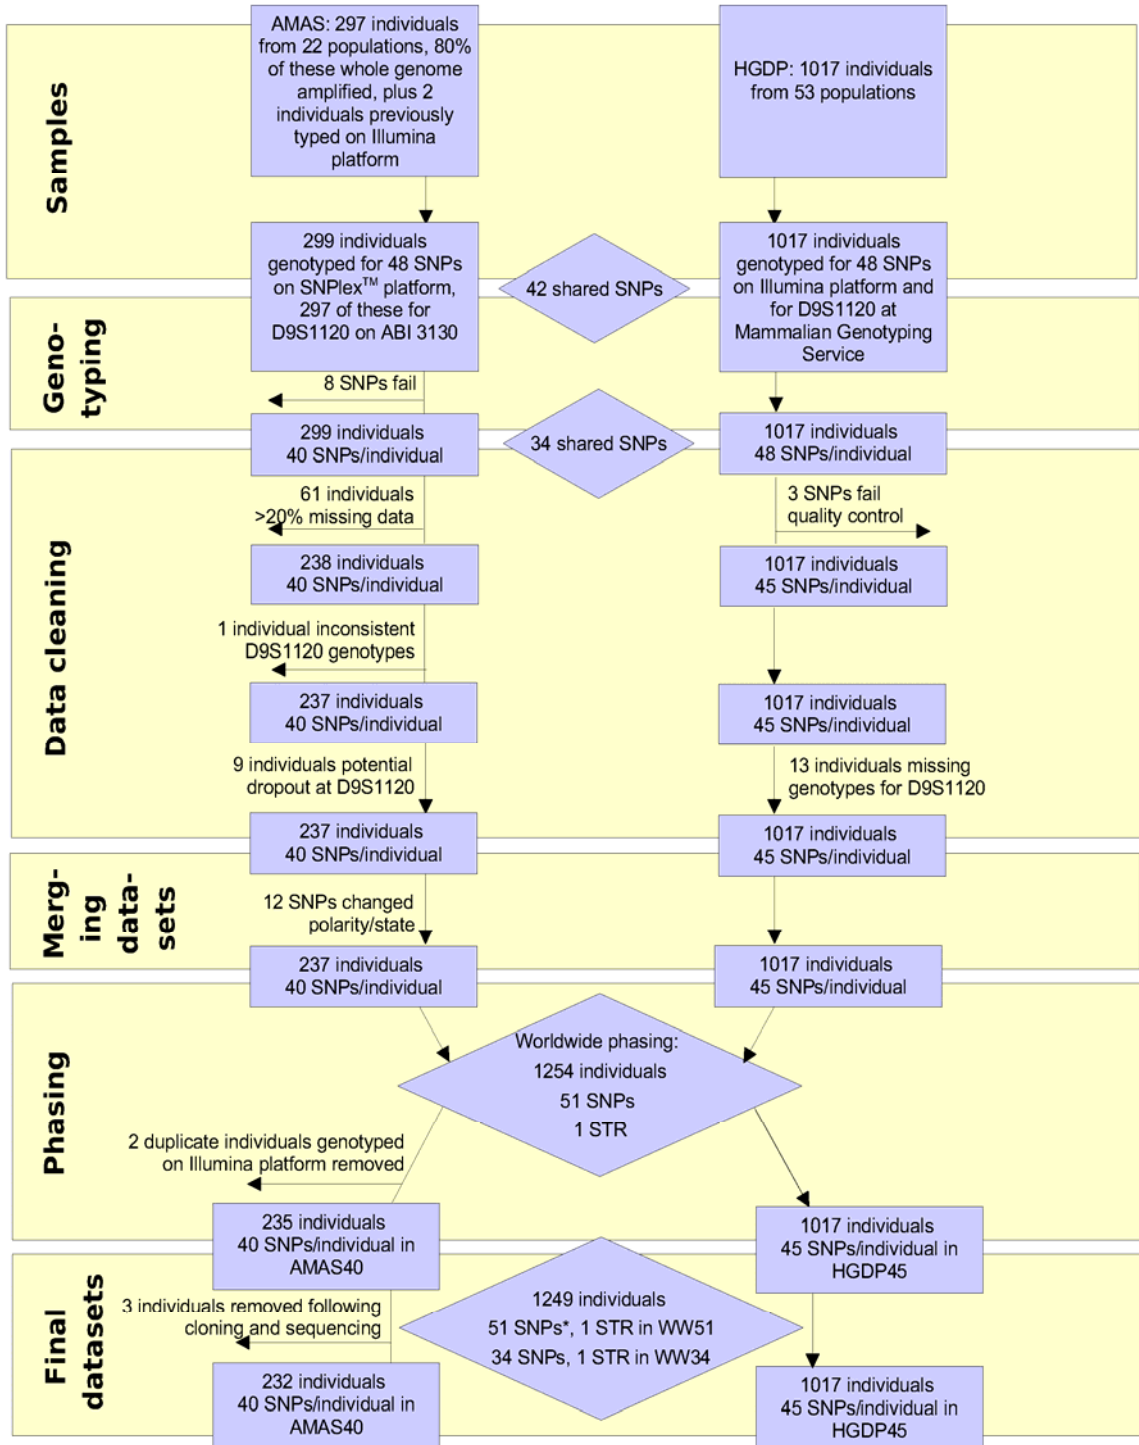

\*Minimum of 11 imputed SNP genotypes for AMAS40 samples in WW51 and minimum of 6 imputed SNP genotypes for HGDP45 samples in WW34

Table S1. Populations sampled in this study.

| <b>Population</b>     | <b>Symbol</b> | <b>Sample size</b> | <b>Region</b>     | <b>Dataset</b> |
|-----------------------|---------------|--------------------|-------------------|----------------|
| Aleut                 | 34            | 17                 | Americas          | AMAS40         |
| Apache                | 39            | 19                 | Americas          | AMAS40         |
| Cherokee              | 49            | 10                 | Americas          | AMAS40         |
| Chippewa              | 45            | 11                 | Americas          | AMAS40         |
| Creek                 | 47            | 4                  | Americas          | AMAS40         |
| Dogrib                | 37            | 11                 | Americas          | AMAS40         |
| Fox                   | 48            | 2                  | Americas          | AMAS40         |
| Huichol               | 42            | 9                  | Americas          | AMAS40         |
| Inuit                 | 53            | 3                  | Americas          | AMAS40         |
| Jemez                 | 41            | 6                  | Americas          | AMAS40         |
| Mixtec                | 44            | 27                 | Americas          | AMAS40         |
| NorthernPaiute        | 36            | 8                  | Americas          | AMAS40         |
| Seri                  | 38            | 9                  | Americas          | AMAS40         |
| Sioux                 | 43            | 5                  | Americas          | AMAS40         |
| Washo                 | 35            | 9                  | Americas          | AMAS40         |
| Karitiana             | 51            | 24                 | Americas          | HGDP45         |
| Maya                  | 46            | 25                 | Americas          | HGDP45         |
| Piapoco               | 50            | 13                 | Americas          | HGDP45         |
| Pima                  | 40            | 21                 | Americas          | HGDP45         |
| Surui                 | 52            | 21                 | Americas          | HGDP45         |
| Chukchi               | 33            | 22                 | East-Central Asia | AMAS40         |
| Koryaks               | 32            | 19                 | East-Central Asia | AMAS40         |
| AltaiKazakh           | 13            | 14                 | East-Central Asia | AMAS40         |
| Mongola-OuterMongolia | 20            | 20                 | East-Central Asia | AMAS40         |
| NorthernAltai         | 12            | 2                  | East-Central Asia | AMAS40         |
| SouthernAltai         | 11            | 5                  | East-Central Asia | AMAS40         |
| Cambodian             | 19            | 9                  | East-Central Asia | HGDP45         |
| Dai                   | 16            | 10                 | East-Central Asia | HGDP45         |
| Daur                  | 27            | 10                 | East-Central Asia | HGDP45         |
| Han                   | 24            | 34                 | East-Central Asia | HGDP45         |
| Han-NorthernChina     | 23            | 10                 | East-Central Asia | HGDP45         |
| Hezhen                | 30            | 9                  | East-Central Asia | HGDP45         |
| Japanese              | 31            | 29                 | East-Central Asia | HGDP45         |
| Lahu                  | 15            | 10                 | East-Central Asia | HGDP45         |
| Miao                  | 22            | 10                 | East-Central Asia | HGDP45         |
| Mongola-InnerMongolia | 25            | 10                 | East-Central Asia | HGDP45         |
| Naxi                  | 14            | 9                  | East-Central Asia | HGDP45         |
| Oroqen                | 28            | 10                 | East-Central Asia | HGDP45         |
| She                   | 26            | 10                 | East-Central Asia | HGDP45         |
| Tu                    | 17            | 10                 | East-Central Asia | HGDP45         |
| Tujia                 | 21            | 10                 | East-Central Asia | HGDP45         |
| Uygur                 | 9             | 10                 | East-Central Asia | HGDP45         |
| Xibo                  | 10            | 9                  | East-Central Asia | HGDP45         |
| Yakut                 | 29            | 25                 | East-Central Asia | HGDP45         |
| Yi                    | 18            | 10                 | East-Central Asia | HGDP45         |
| Balochi               | 2             | 24                 | South Asia        | HGDP45         |

|                     |    |    |             |        |
|---------------------|----|----|-------------|--------|
| Brahui              | 3  | 24 | South Asia  | HGDP45 |
| Burusho             | 8  | 23 | South Asia  | HGDP45 |
| Hazara              | 5  | 24 | South Asia  | HGDP45 |
| Kalash              | 7  | 25 | South Asia  | HGDP45 |
| Makrani             | 1  | 25 | South Asia  | HGDP45 |
| Pathan              | 6  | 24 | South Asia  | HGDP45 |
| Sindhi              | 4  | 25 | South Asia  | HGDP45 |
| Bedouin             | NA | 47 | Middle East | HGDP45 |
| Druze               | NA | 45 | Middle East | HGDP45 |
| Mozabite            | NA | 29 | Middle East | HGDP45 |
| Palestinian         | NA | 48 | Middle East | HGDP45 |
| Adygei              | NA | 15 | Europe      | HGDP45 |
| Basque              | NA | 24 | Europe      | HGDP45 |
| French              | NA | 29 | Europe      | HGDP45 |
| Italian             | NA | 12 | Europe      | HGDP45 |
| Orcadian            | NA | 14 | Europe      | HGDP45 |
| Russian             | NA | 24 | Europe      | HGDP45 |
| Sardinian           | NA | 27 | Europe      | HGDP45 |
| Tuscan              | NA | 6  | Europe      | HGDP45 |
| Melanesian          | NA | 19 | Oceania     | HGDP45 |
| Papuan              | NA | 16 | Oceania     | HGDP45 |
| BantuKenya          | NA | 12 | Africa      | HGDP45 |
| BantuSouthernAfrica | NA | 8  | Africa      | HGDP45 |
| BiakaPygmy          | NA | 31 | Africa      | HGDP45 |
| Mandenka            | NA | 23 | Africa      | HGDP45 |
| MbutiPygmy          | NA | 14 | Africa      | HGDP45 |
| San                 | NA | 7  | Africa      | HGDP45 |
| Yoruba              | NA | 25 | Africa      | HGDP45 |

Table S2. SNPs for which the samples in this study were genotyped.

| <b>Locus</b> | <b>Position (NCBI<br/>Build 35)</b> | <b>Dataset</b> |
|--------------|-------------------------------------|----------------|
| rs17088334   | 85053298                            | HGDP45         |
| rs17337860   | 85084053                            | HGDP45         |
| rs17088374   | 85096450                            | WW34           |
| rs6559853    | 85110900                            | HGDP45         |
| rs2841445    | 85126731                            | WW34           |
| rs17088420   | 85141513                            | HGDP45         |
| rs2841486    | 85155600                            | WW34           |
| rs4877918    | 85181132                            | WW34           |
| rs7032592    | 85193290                            | WW34           |
| rs7862916    | 85206478                            | WW34           |
| rs2814734    | 85222343                            | WW34           |
| rs2841443    | 85225848                            | AMAS40         |
| rs2592991    | 85230060                            | AMAS40         |
| rs13291799   | 85237265                            | WW34           |
| rs2593017    | 85240224                            | AMAS40         |
| rs2841453    | 85244429                            | AMAS40         |
| rs12685505   | 85247160                            | AMAS40         |
| rs12555508   | 85250750                            | AMAS40         |
| rs10512167   | 85253684                            | WW34           |
| rs7048862    | 85269825                            | WW34           |
| rs3849872    | 85284382                            | WW34           |
| rs11140976   | 85300443                            | WW34           |
| rs11140984   | 85314284                            | WW34           |
| rs17426617   | 85314387                            | WW34           |
| rs6559867    | 85316239                            | WW34           |
| D9S1120      | 85321417                            | -              |
| rs4877301    | 85321930                            | WW34           |
| rs3849873    | 85322587                            | WW34           |
| rs1992812    | 85329420                            | HGDP45         |
| rs1447026    | 85329946                            | WW34           |
| rs7042753    | 85331227                            | WW34           |
| rs4877940    | 85332664                            | HGDP45         |
| rs1374500    | 85339567                            | WW34           |
| rs4082114    | 85339786                            | HGDP45         |
| rs10512168   | 85345810                            | WW34           |
| rs1014690    | 85351123                            | HGDP45         |
| rs1834264    | 85363552                            | WW34           |
| rs2278111    | 85378655                            | WW34           |
| rs1030303    | 85395220                            | HGDP45         |
| rs10481762   | 85407691                            | WW34           |
| rs1863120    | 85420237                            | HGDP45         |
| rs1469202    | 85435373                            | WW34           |
| rs11141033   | 85448369                            | HGDP45         |
| rs2814724    | 85463213                            | WW34           |
| rs7025722    | 85480379                            | WW34           |
| rs7031647    | 85506670                            | WW34           |
| rs10117745   | 85525431                            | WW34           |
| rs7863248    | 85537681                            | WW34           |
| rs4877949    | 85551964                            | WW34           |
| rs4877950    | 85570008                            | WW34           |
| rs3916184    | 85582785                            | WW34           |
| rs12379804   | 85595034                            | WW34           |

Table S3. SNPs for which we changed the minor allele or allele state in AMAS40 due to different genotyping platforms (Illumina and SNPlex<sup>Tm</sup>) used for HGDP45 and AMAS40. Two samples from HGDP45 were genotyped on the new platform (SNPlex<sup>Tm</sup>) with AMAS40 to assist in determining changes in minor alleles or allele states.

| <b>Locus</b> | <b>Position</b> | <b>Change in minor allele?</b> | <b>Change in allele states?</b> | <b>HGDP45</b> | <b>AMAS40</b> | <b>Polarity apparent from homozygous HGDP controls?</b> | <b>Regional allele frequency consistent with controls?</b> |
|--------------|-----------------|--------------------------------|---------------------------------|---------------|---------------|---------------------------------------------------------|------------------------------------------------------------|
| rs7042753    | 85331227        | -                              | Y                               | A/G           | T/C           | Y                                                       | Y                                                          |
| rs11140976   | 85300443        | -                              | Y                               | A/G           | T/C           | Y                                                       | Ambiguous                                                  |
| rs4877949    | 85551964        | -                              | Y                               | A/G           | T/C           | Y                                                       | Ambiguous                                                  |
| rs12379804   | 85595034        | Y                              | -                               | C/G           | G/C           | Y                                                       | Y                                                          |
| rs10481762   | 85407691        | -                              | Y                               | G/T           | C/A           | Y                                                       | Y                                                          |
| rs2841445    | 85126731        | -                              | Y                               | G/T           | C/A           | Y                                                       | Y                                                          |
| rs2278111    | 85378655        | -                              | Y                               | T/C           | A/G           | Y                                                       | Y                                                          |
| rs2841486    | 85155600        | -                              | Y                               | T/C           | A/G           | Y                                                       | Y                                                          |
| rs10117745   | 85525431        | -                              | Y                               | T/C           | A/G           | N                                                       | Y                                                          |
| rs3849872    | 85284382        | -                              | Y                               | T/C           | A/G           | Y                                                       | Ambiguous                                                  |
| rs2814724    | 85463213        | -                              | Y                               | T/G           | A/C           | Y                                                       | Ambiguous                                                  |

Table S4. Phase error rates for different geographic groupings of the populations.

| <b>Grouping</b>                  | <b>Error rate (10% of genotypes masked)</b> |
|----------------------------------|---------------------------------------------|
| Worldwide (no grouping)          | 0.1022                                      |
| East Asia plus Americas          | 0.0923                                      |
| East Asia                        | 0.1161                                      |
| Americas                         | 0.0904                                      |
| East Asia minus Western Beringia | 0.0847                                      |
| Americas plus Western Beringia   | 0.0984                                      |

Table S5. PCR and sequencing primers used to determine short haplotypes for three chromosomes with the 9-repeat allele and with haplotypes very divergent from the AMH.

| <b>Primer</b>         | <b>Primer sequence (5' to 3')</b> | <b>Use</b>         |
|-----------------------|-----------------------------------|--------------------|
| D9-1440R <sup>2</sup> | GGGTATGCTGAGGATTAATGAG            | PCR                |
| D9-35F <sup>2</sup>   | AGGATTTGAGACAAATGAAAGCA           | PCR                |
| D9S1120R <sup>1</sup> | TTAGCTGCTTCTGGGAAAGA              | PCR and sequencing |
| D9S1120F <sup>1</sup> | TAGGATTTGAGACAAATGAAAGC           | PCR and sequencing |
| M13-20-F              | GTAAAACGACGGCCAGT                 | sequencing         |
| M13-R                 | AACAGCTATGACCATG                  | sequencing         |
| D9-630F               | ATTTCCCAAATATAGTTGATCGT           | sequencing         |
| D9-1408R              | ATAAAGCACTTGGTATGTCACAG           | sequencing         |

<sup>1</sup> Short fragment <sup>2</sup> Long fragment

Table S6. Chromosomes with the 9-repeat allele and non-AMH haplotypes in WW34. The position of each SNP, in Mb, is for NCBI Build 35. From D9S1120 in either direction, cells were colored red until an allele that differed from the AMH.

Recombinant haplotypes are labeled R1 through R7.

|              |           | Position | rs SNP ID/<br>microsatellite | 85.254   | 85.270  | 85.284  | 85.300   | 85.314   | 85.314   | 85.316  | 85.321  | 85.322  | 85.323  | 85.330  |
|--------------|-----------|----------|------------------------------|----------|---------|---------|----------|----------|----------|---------|---------|---------|---------|---------|
| Sample       | Haplotype |          |                              | 10512167 | 7048862 | 3849872 | 11140976 | 11140984 | 17426617 | 6559867 | D9S1120 | 4877301 | 3849873 | 1447026 |
| -            | AMH       |          |                              | G        | T       | C       | A        | A        | T        | A       | 9       | G       | C       | A       |
| Inuit_99     | R1        |          |                              | G        | T       | C       | A        | A        | T        | A       | 9       | C       | C       | A       |
| Dogrib_09    | R2        |          |                              | G        | C       | C       | A        | A        | T        | A       | 9       | G       | C       | A       |
| Washo_101    | R3        |          |                              | G        | T       | C       | A        | A        | T        | A       | 9       | G       | C       | G       |
| N.Paiute_046 | R4        |          |                              | A        | T       | C       | A        | A        | T        | A       | 9       | G       | C       | G       |
| Koryak_114   | R5        |          |                              | A        | T       | C       | A        | A        | T        | A       | 9       | G       | C       | A       |
| Koryak_66    | R5        |          |                              | A        | T       | C       | A        | A        | T        | A       | 9       | G       | C       | A       |
| Apache_492   | R5        |          |                              | A        | T       | C       | A        | A        | T        | A       | 9       | G       | C       | A       |
| Apache_398   | R5        |          |                              | A        | T       | C       | A        | A        | T        | A       | 9       | G       | C       | A       |
| Chippewa_15  | R5        |          |                              | A        | T       | C       | A        | A        | T        | A       | 9       | G       | C       | A       |
| Chippewa_03  | R5        |          |                              | A        | T       | C       | A        | A        | T        | A       | 9       | G       | C       | A       |
| Washo_101    | R5        |          |                              | A        | T       | C       | A        | A        | T        | A       | 9       | G       | C       | A       |
| Washo_104    | R5        |          |                              | A        | T       | C       | A        | A        | T        | A       | 9       | G       | C       | A       |
| N.Paiute_078 | R5        |          |                              | A        | T       | C       | A        | A        | T        | A       | 9       | G       | C       | A       |
| Cherokee_55  | R5        |          |                              | A        | T       | C       | A        | A        | T        | A       | 9       | G       | C       | A       |
| Cherokee_53  | R5        |          |                              | A        | T       | C       | A        | A        | T        | A       | 9       | G       | C       | A       |
| Inuit_52     | R6        |          |                              | G        | C       | C       | G        | G        | A        | A       | 9       | G       | C       | A       |
| Jemez_24     | R7        |          |                              | A        | T       | C       | A        | A        | A        | G       | 9       | G       | C       | A       |
